# Supplementary material
Source: publisher figshare collection journal article supplement (https://acs.figshare.com/ndownloader/files/3815527)
Supplement: Supplementary file 1 [file 3815527]

## **Supporting Information**

### **Versatile, Tannic Acid-Mediated Surface PEGylation for Marine Antifouling Applications**

Suyeob Kim, Taewoo Gim, and Sung Min Kang\*

Department of Marine Bio-Materials & Aquaculture, Pukyong National University,  
Busan, 608-737, Korea,

\* To whom correspondence should be addressed.

E-mail: [smk12@pknu.ac.kr](mailto:smk12@pknu.ac.kr)

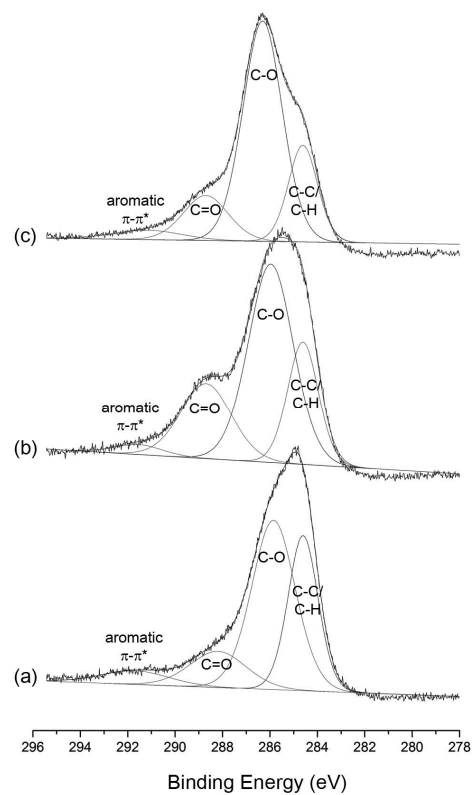

**Figure S1.** High-resolution XPS spectra (C 1s) of (a) pDA-, (b) pDA/TA-coated, and (c) pDA/TA/PEG-coated Si surfaces.

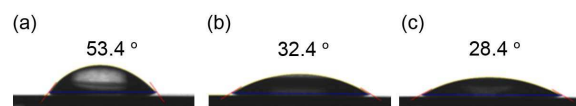

**Figure S2.** Water contact angle images of (a) non-treated, (b) pDA-, and (c) pDA/TA-coated stainless steel surfaces.

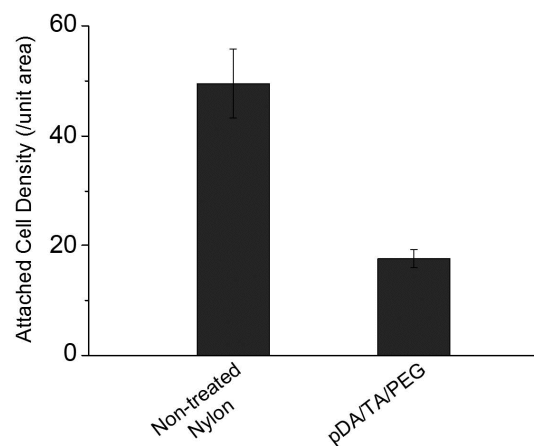

**Figure S3.** Diatom adhesion on non-treated and pDA/TA/PEG-coated nylon surfaces (unit area: 0.11 mm<sup>2</sup>). Each point is the mean from 60 counts on 3 replicate samples. The error bars display the 95% confidence limits.
